# Supplementary material for: Glioma stem cells promote radioresistance by preferential activation of the DNA damage response
Source: Springer Nature journal article supplement (doi:10.1038/nature05236), 2006-10-18

Supplemental Table 1. Neurosphere formation and tumorigenicity is enriched within the CD133+ tumour cell populations derived from human primary gliomas and glioma xenografts.

| GBM samples or Glioma xenografts | Cells  | % cells forming Neurospheres | Minimum number of cells for tumour initiation (8 weeks) |
|----------------------------------|--------|------------------------------|---------------------------------------------------------|
| T3565<br>Primary Glioma          | CD133+ | 81 ± 6 %                     | 500                                                     |
|                                  | CD133- | 0 %                          | No tumours detected at 2 x 10 <sup>6</sup>              |
|                                  | Total  | 2.6 ± 0.7 %                  | 20,000                                                  |
| T3691<br>Primary Glioma          | CD133+ | 76 ± 8 %                     | 1,000                                                   |
|                                  | CD133- | 0 %                          | No tumours detected at 2 x 10 <sup>6</sup>              |
|                                  | Total  | 3.4 ± 0.6 %                  | 30,000                                                  |
| T3750<br>Primary Glioma          | CD133+ | 83 ± 5 %                     | 1,000                                                   |
|                                  | CD133- | 0 %                          | No tumours detected at 2 x 10 <sup>6</sup>              |
|                                  | Total  | 2.4 ± 0.9 %                  | 40,000                                                  |
| D456MG                           | CD133+ | 89 ± 5 %                     | 300                                                     |
|                                  | CD133- | 3 ± 1.5 %                    | Occ. small tumours at 2 x 10 <sup>6</sup>               |
|                                  | Total  | 3.4 ± 0.6 %                  | 10,000                                                  |
| D317                             | CD133+ | 86 ± 6 %                     | 500                                                     |
|                                  | CD133- | 0 %                          | No tumours detected at 2 x 10 <sup>6</sup>              |
|                                  | Total  | 3.8 ± 0.5 %                  | 15,000                                                  |
| D54MG                            | CD133+ | 81 ± 7 %                     | 500                                                     |
|                                  | CD133- | 0 %                          | No tumours detected at 2 x 10 <sup>6</sup>              |
|                                  | Total  | 2.9 ± 0.6 %                  | 20,000                                                  |

Supplemental Table 2. *In Vivo* Limiting Dilution Tumorigenic Assays of Untreated and Irradiated Cells

**a**

| GBM Samples | Cell Type | Minimum number of cells for tumour initiation (8 weeks) |                                        |                                        |
|-------------|-----------|---------------------------------------------------------|----------------------------------------|----------------------------------------|
|             |           | Untreated                                               | 2 Gy IR<br>(Injected 48 hr after IR)   | 5 Gy IR<br>(Injected 48 hr after IR)   |
| T3691       | CD133+    | 1000                                                    | 1000                                   | 5000                                   |
|             | CD133-    | No tumours detected at 10 <sup>6</sup>                  | No tumours detected at 10 <sup>6</sup> | No tumours detected at 10 <sup>6</sup> |
| T3565       | CD133+    | 500                                                     | 1000                                   | 5000                                   |
|             | CD133-    | No tumours detected at 10 <sup>6</sup>                  | No tumours detected at 10 <sup>6</sup> | No tumours detected at 10 <sup>6</sup> |

**b**

| GBM Samples And Cell Type | Minimum number of cells for tumour initiation (8 weeks) |                     |                     |                     |                     |
|---------------------------|---------------------------------------------------------|---------------------|---------------------|---------------------|---------------------|
|                           | Untreated                                               | 24 hr after 2 Gy IR | 48 hr after 2 Gy IR | 72 hr after 2 Gy IR | 96 hr after 2 Gy IR |
| T3691 CD133+              | 1000                                                    | 2000                | 1000                | 1000                | 1000                |
| T3565 CD133+              | 500                                                     | 2000                | 1000                | 1000                | 1000                |

CD133- cells  
from D456MG

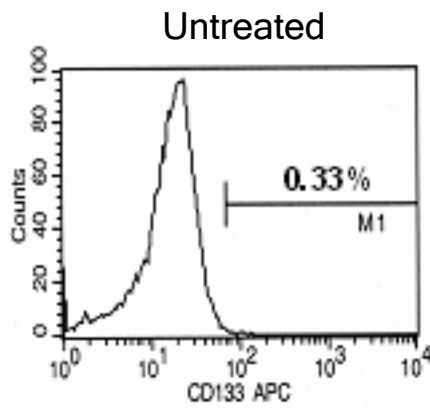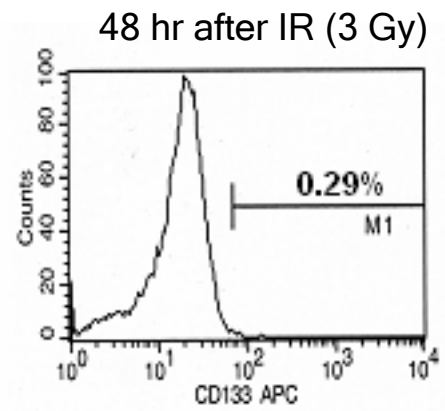

CD133- cells  
from T3607  
GBM

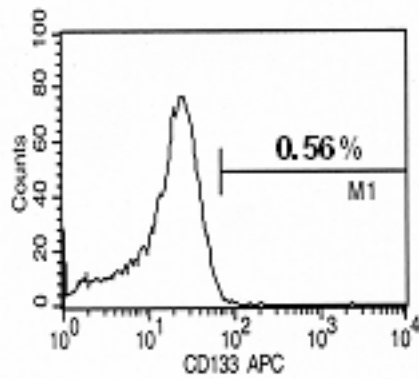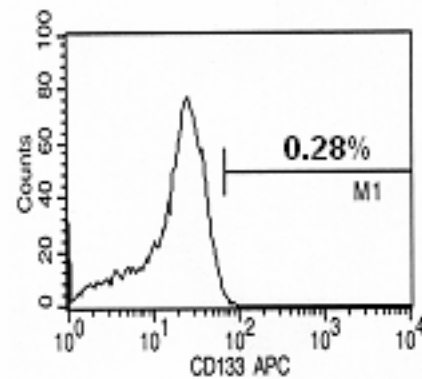

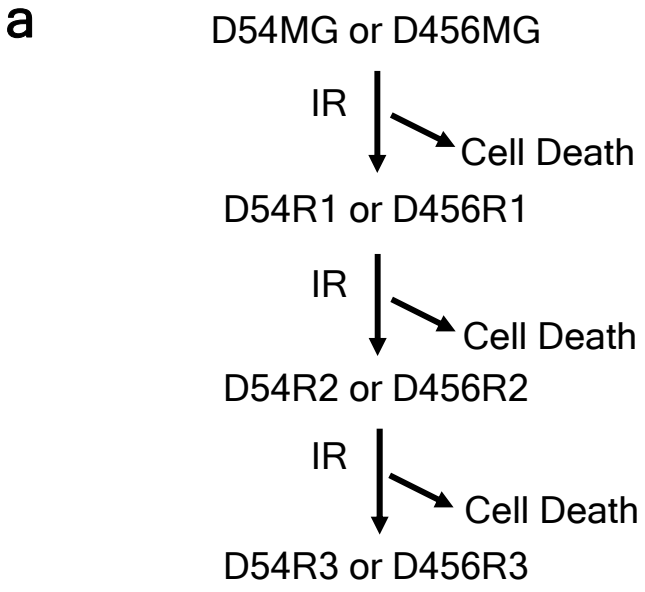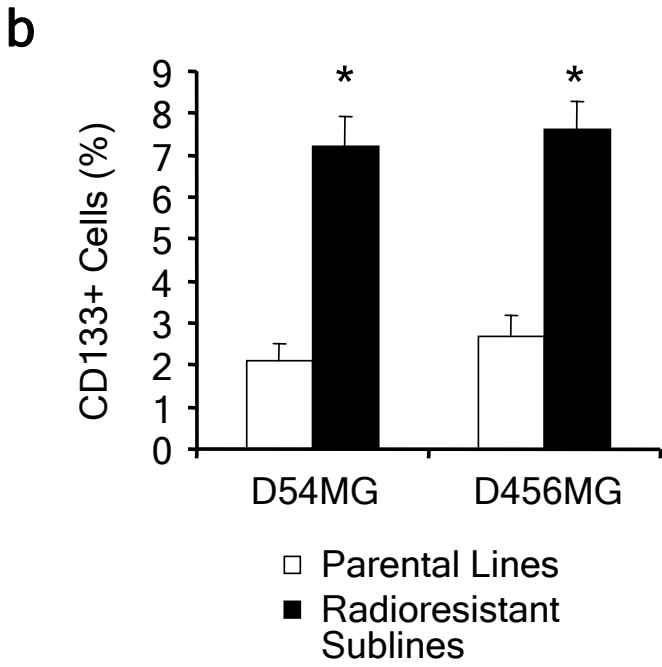

**a**

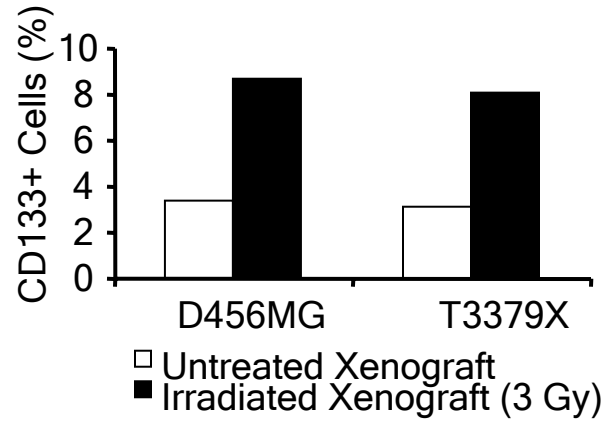

**b**

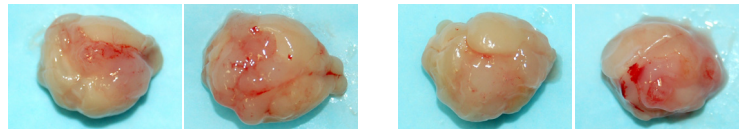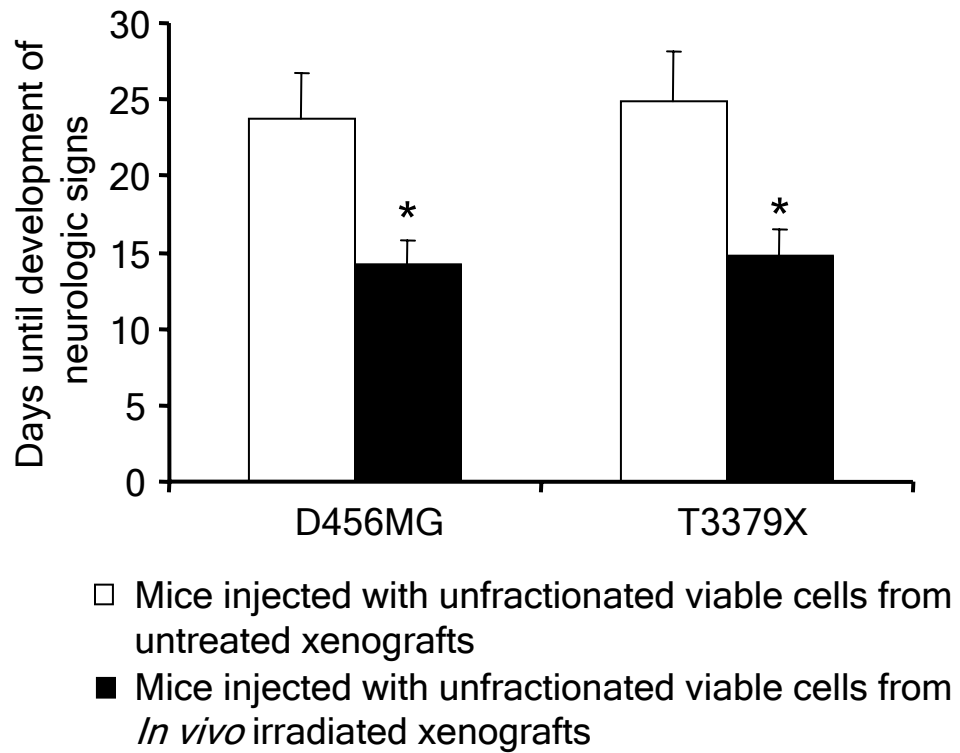

3B4-FITC Staining specific for human cells confirmed  
human origin of tumour cells isolated from glioma xenografts

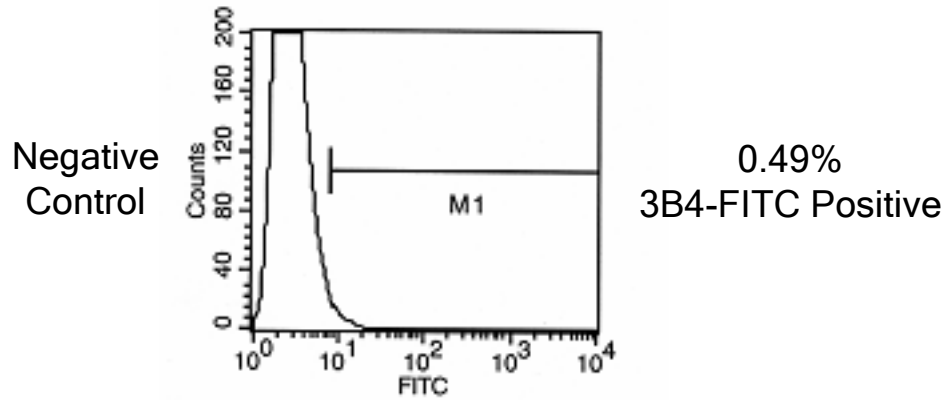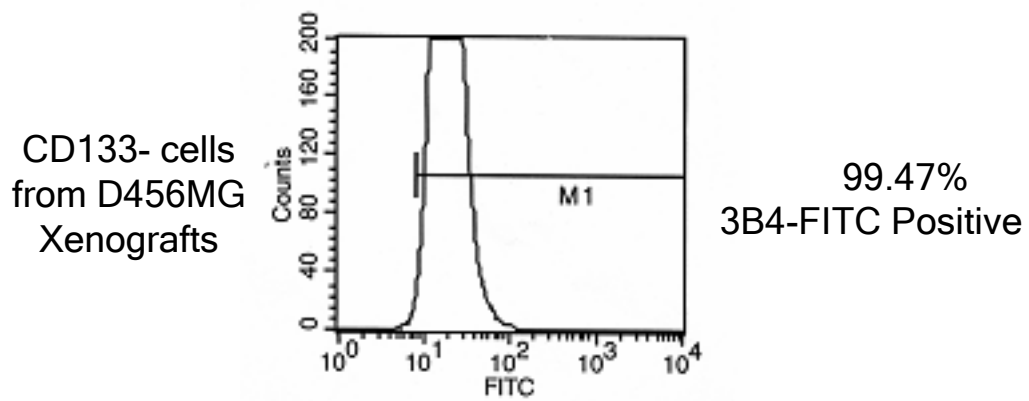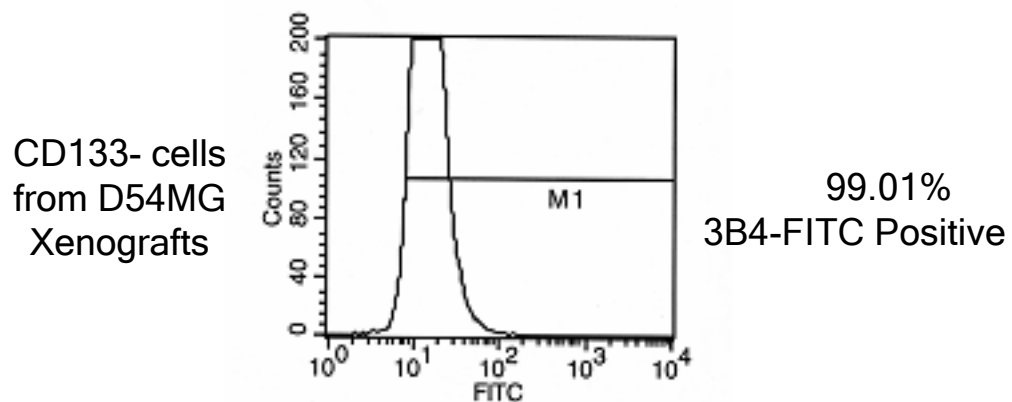

FISH: Chromosome 10 Centromere Probe (Green)

**a**

Control  
Normal cells

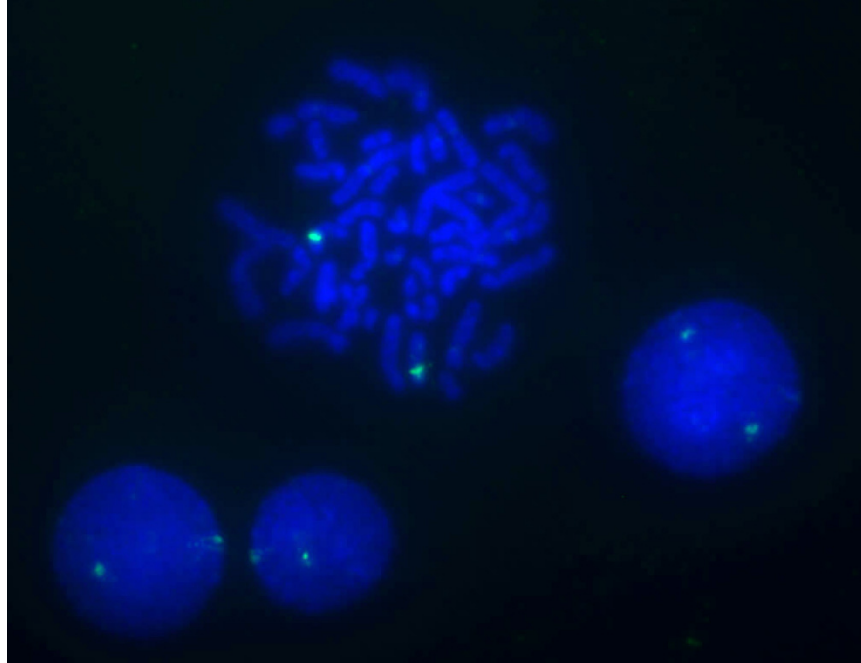

**b**

T3359 Glioma  
Tumour cells

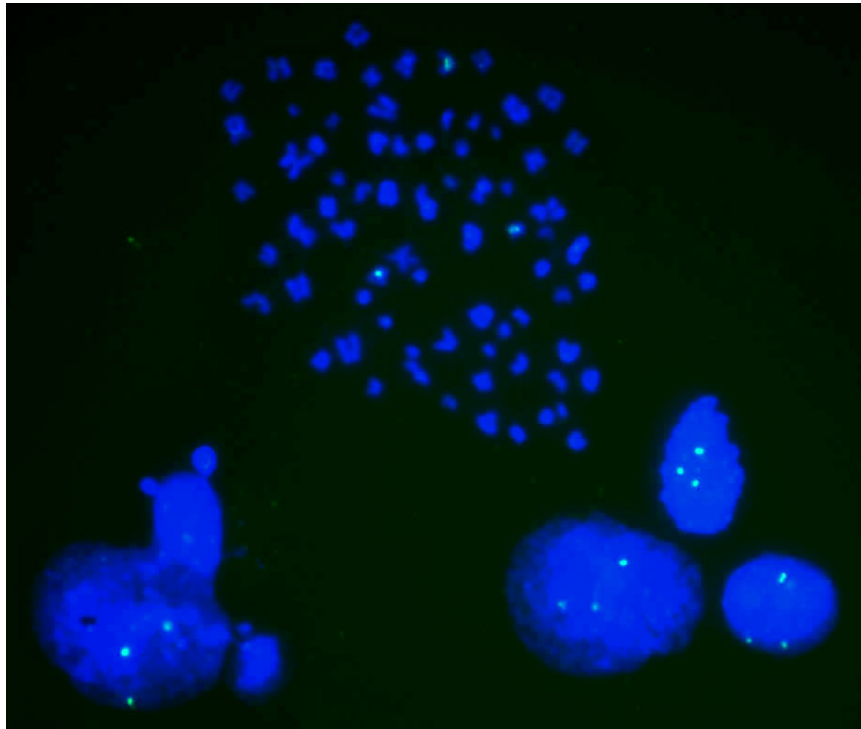

**c**

T3359 CD133-  
glioma cells

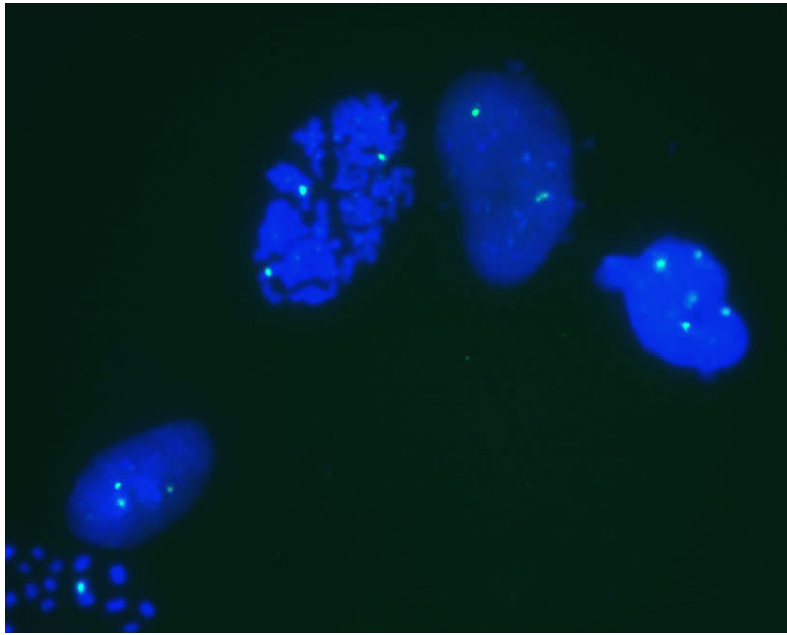

**d**

T3359 CD133-  
glioma cells

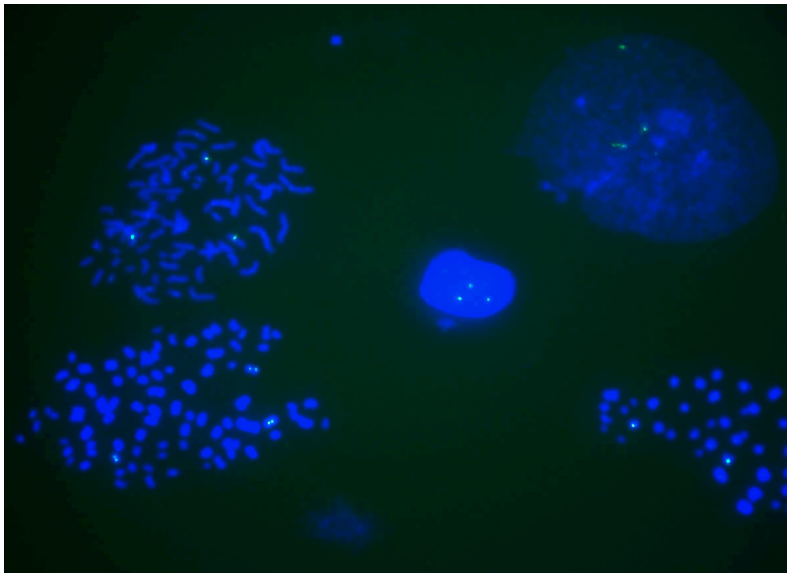

**e**

T3359 CD133-  
glioma cells

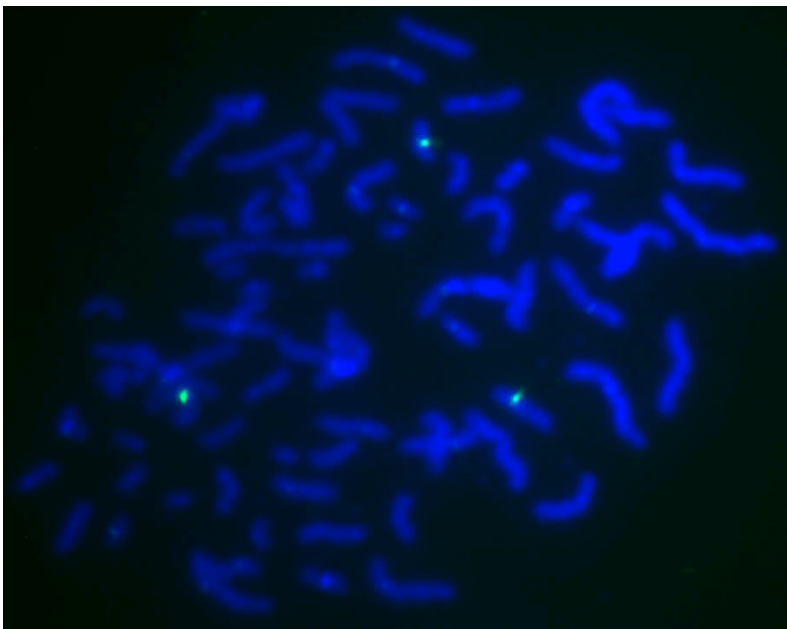



**a** Differentiation of Cancer Stem Cells from D456MG Xenograft

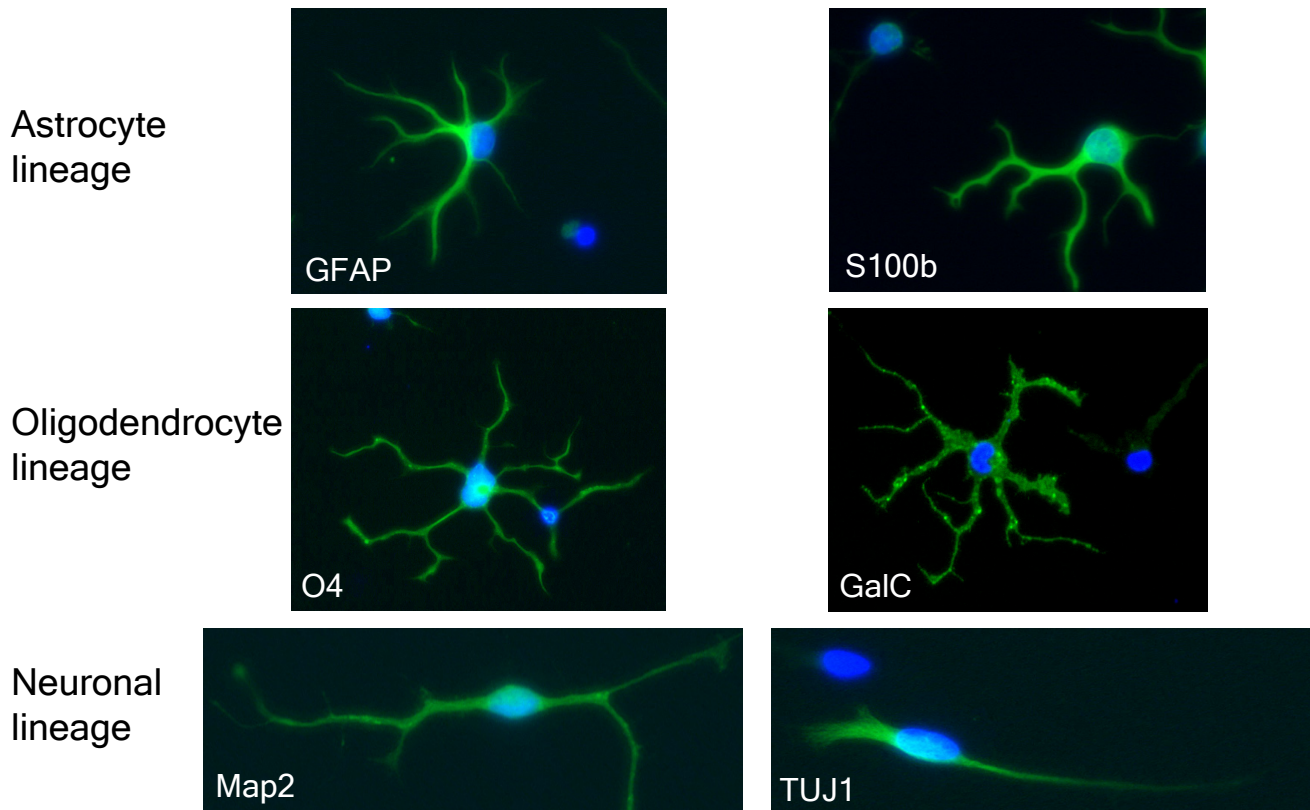

**b** Differentiation of Cancer Stem Cells from 3750 Primary Glioma

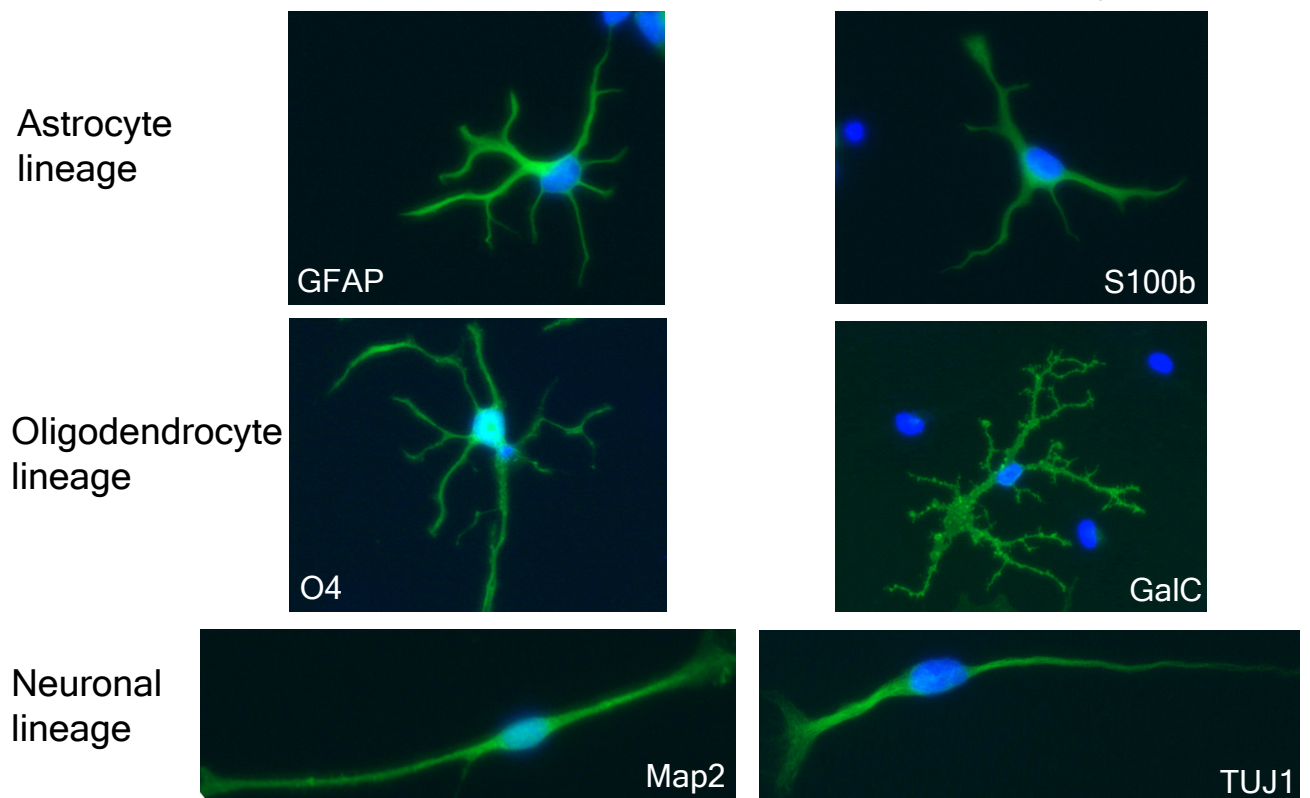

**a** Differentiation of Untreated Cancer Stem Cells from 3781 Primary Glioma

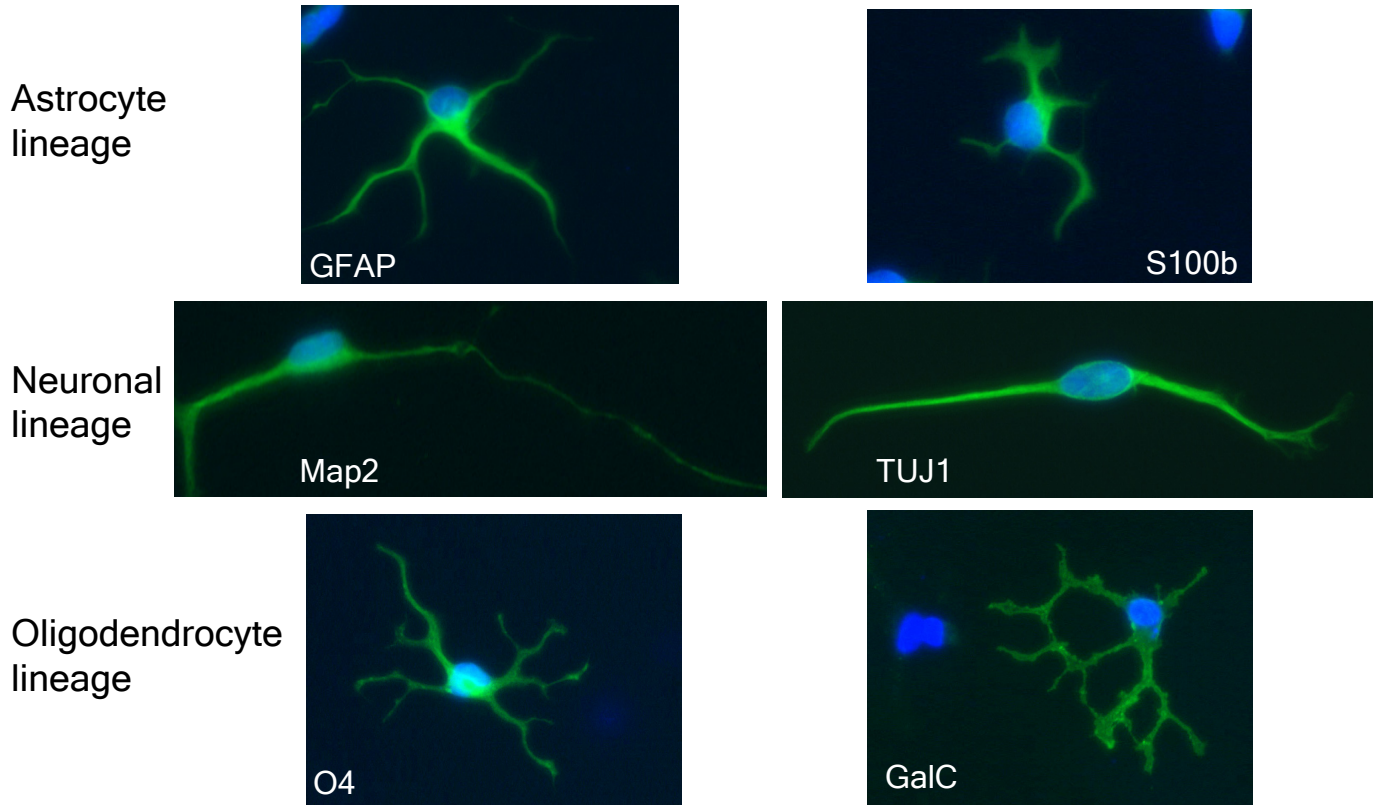

**b** Differentiation of Irradiated (2Gy) Cancer Stem Cells from 3781 Primary Glioma

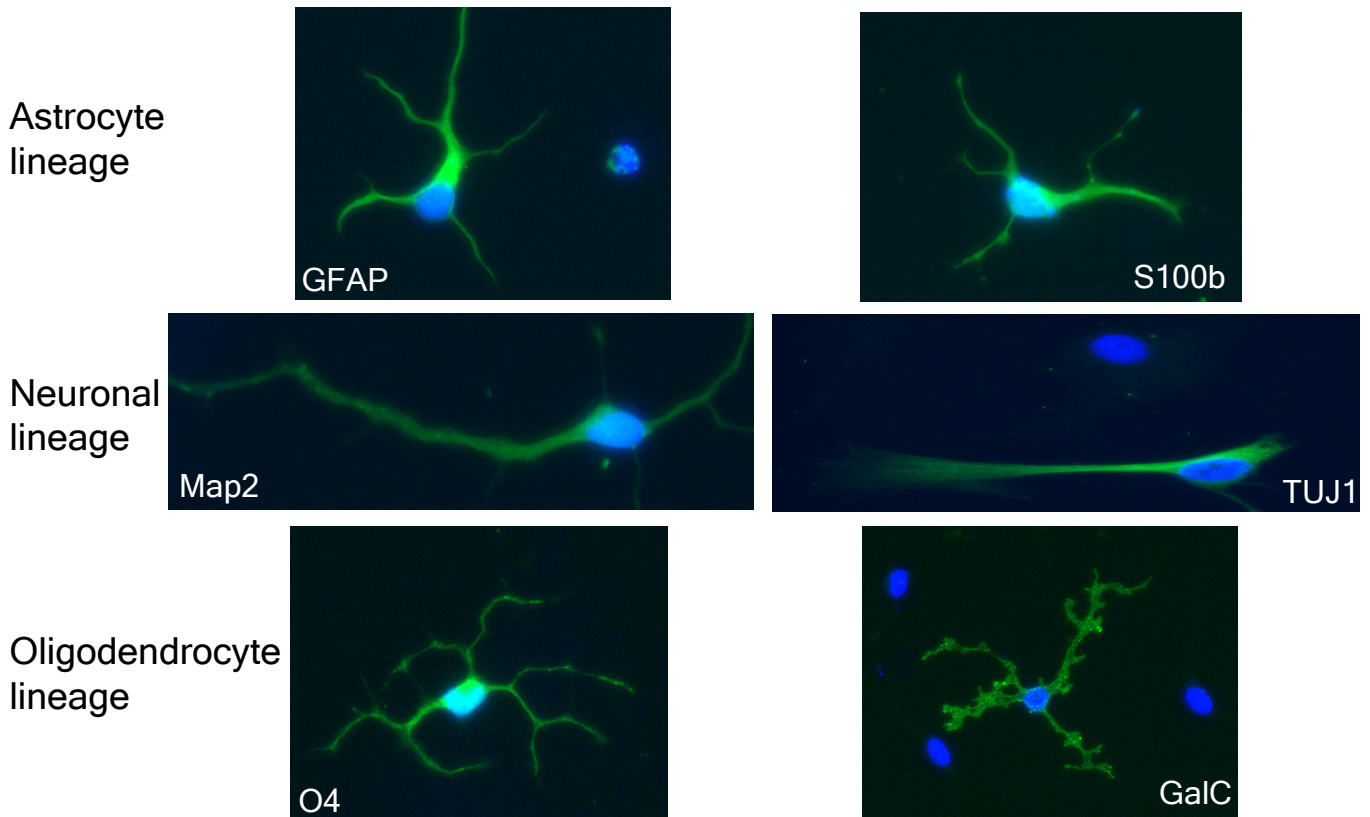

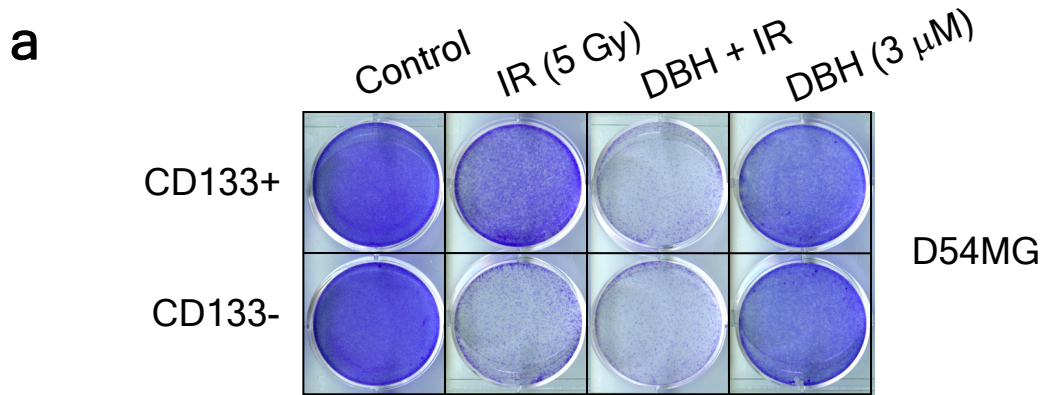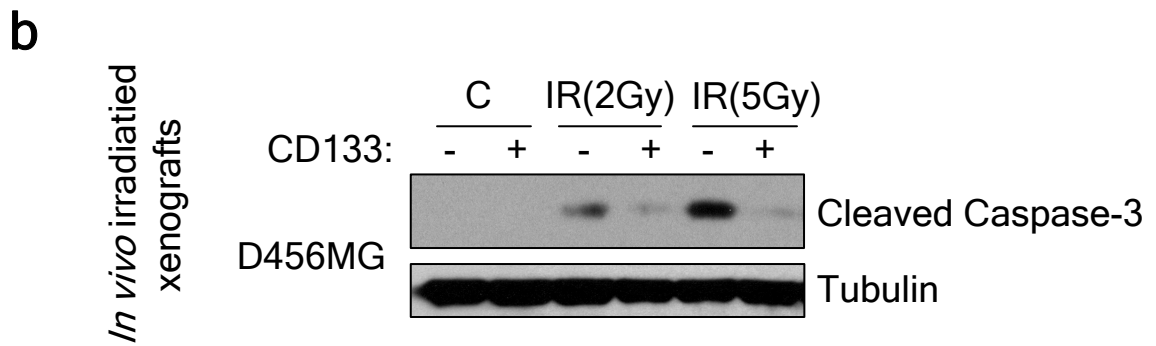

**a** D54MG Glioma Cell Survival in Neurobasal Media without Growth Factors

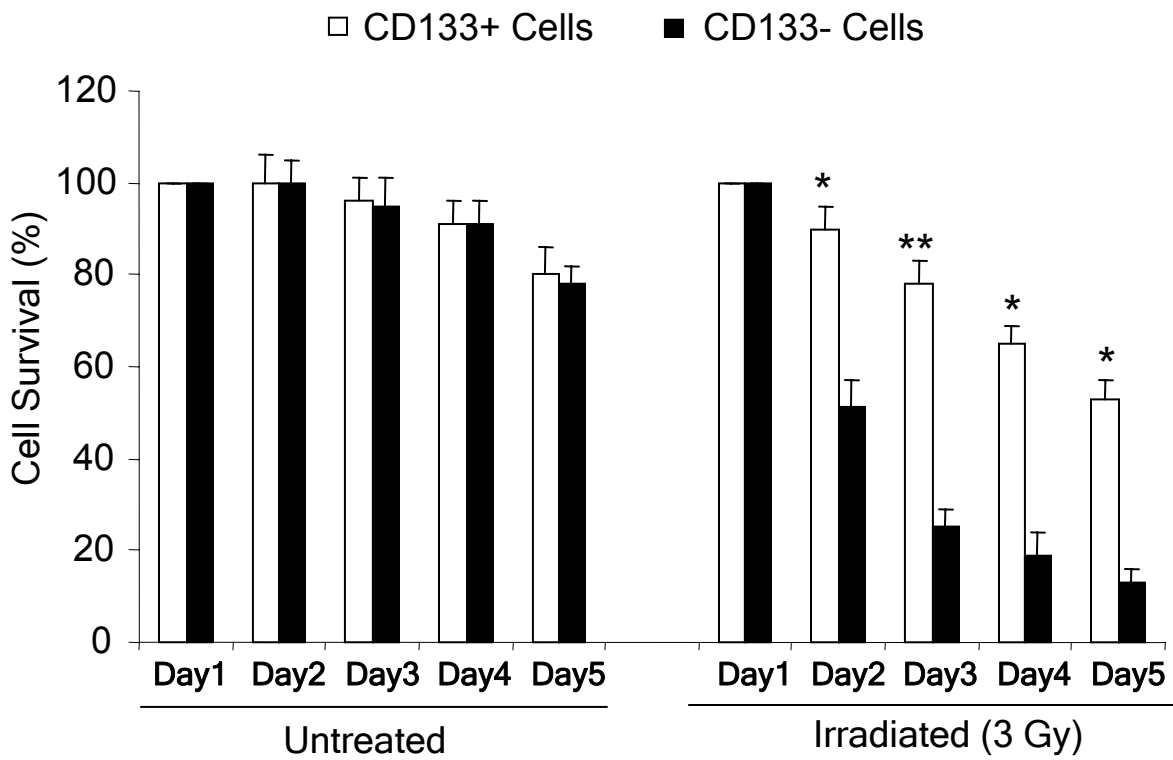

**b** T3781 Primary Glioma Cell Survival in Neurobasal Media without Growth Factors

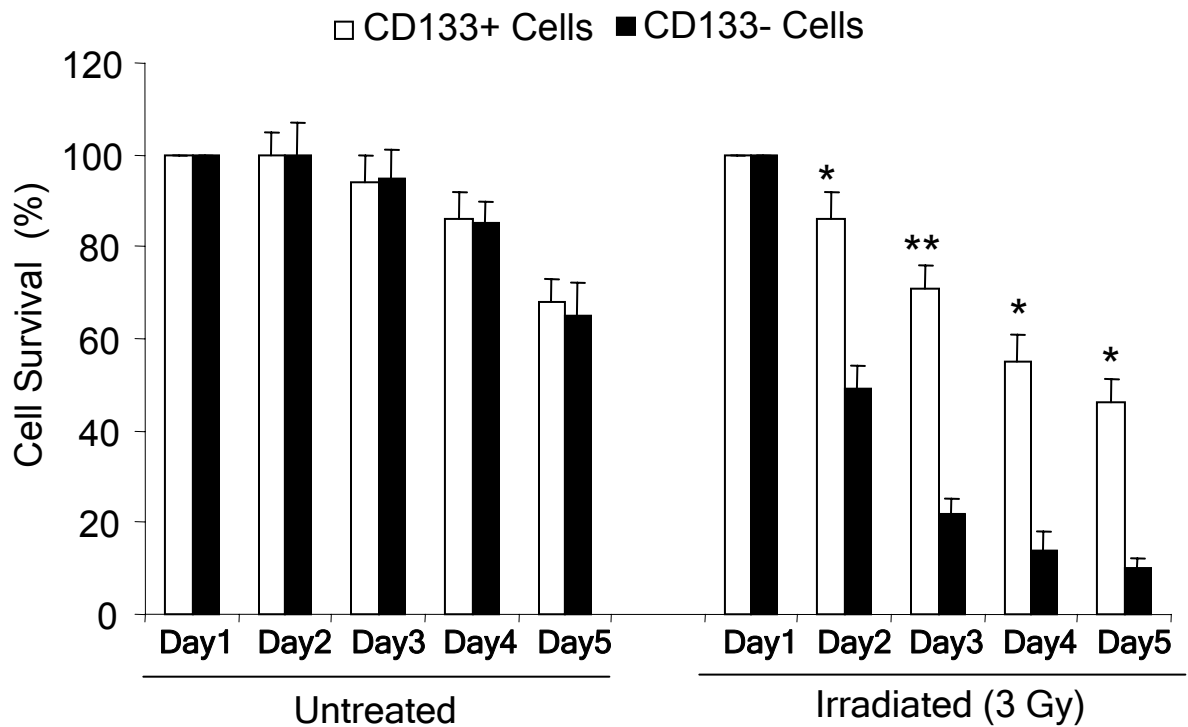

Apoptotic Cell Death of CD133- and CD133+ T3750 Cells Induced by IR in Neurobasal Media with and without Growth Factors

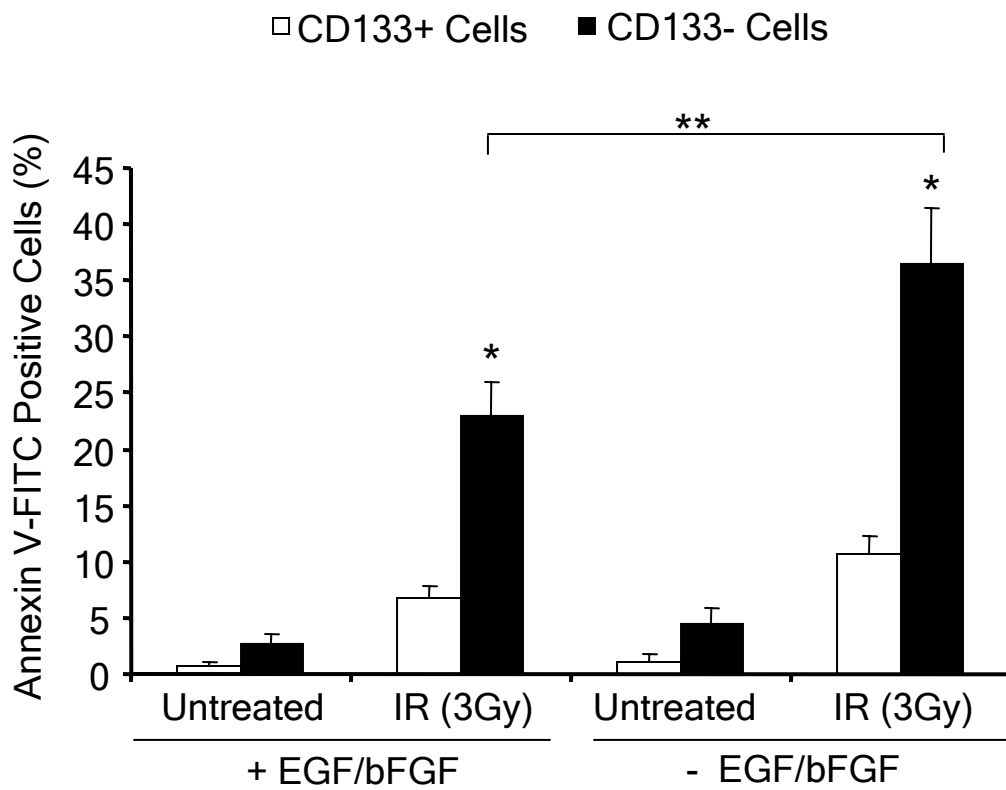

Annexin V-FITC Measurement of IR-induced Apoptotic Cell Death of CD133+ and CD133- Cells from T3781 Primary Glioma

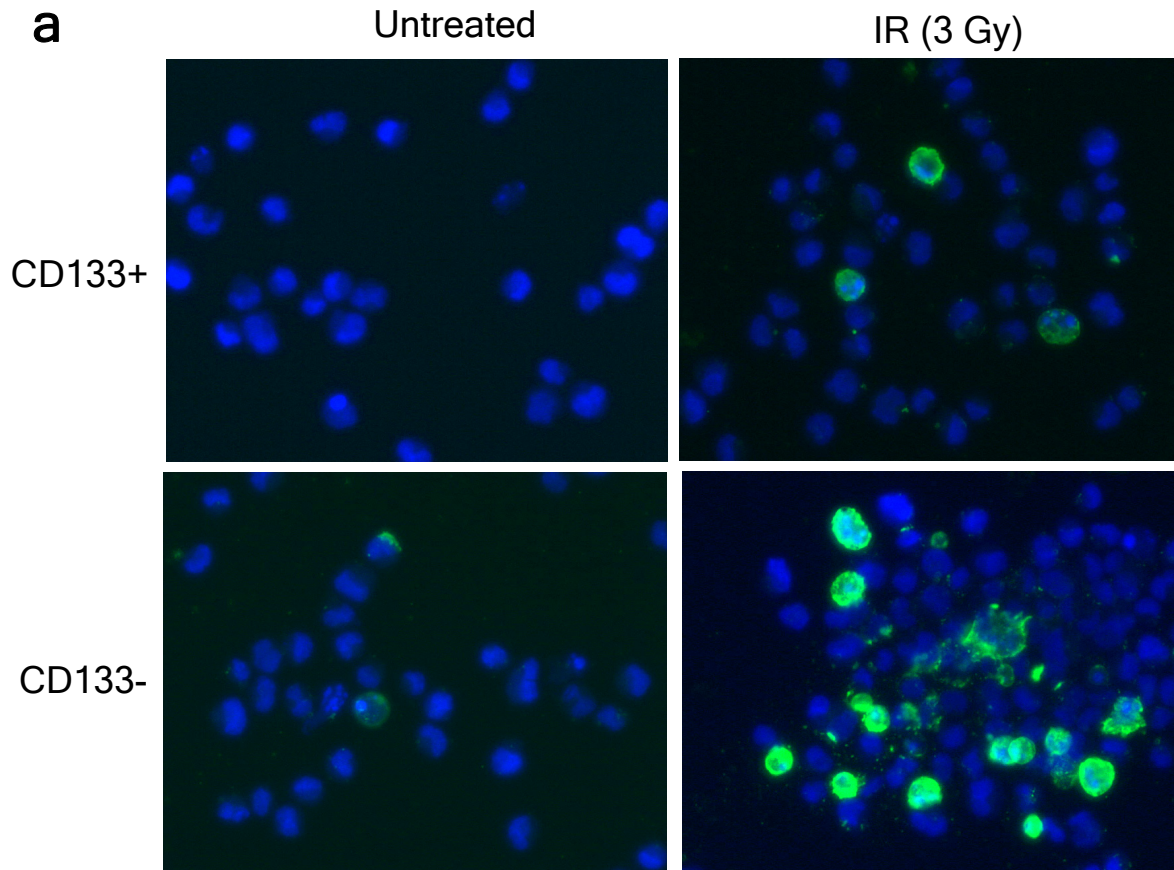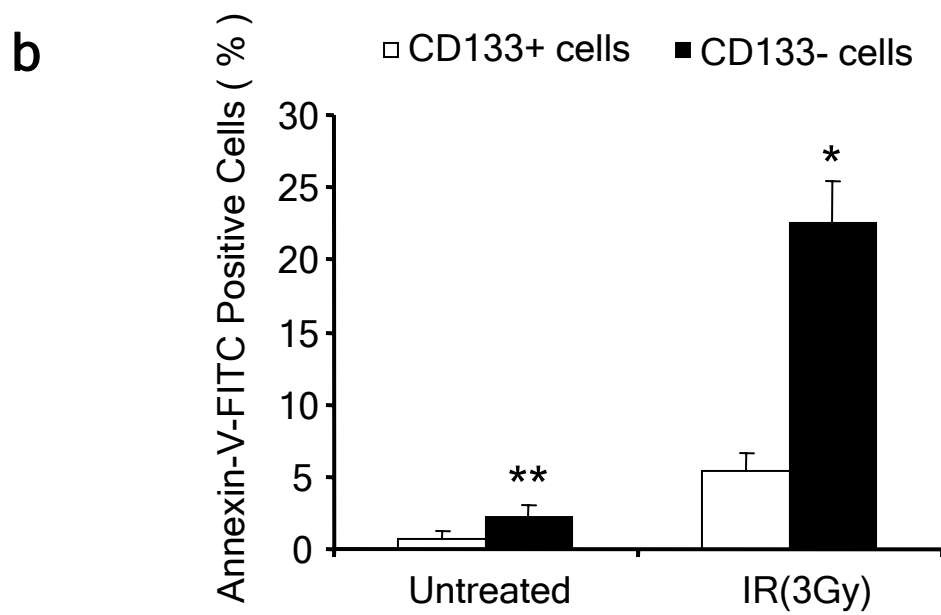

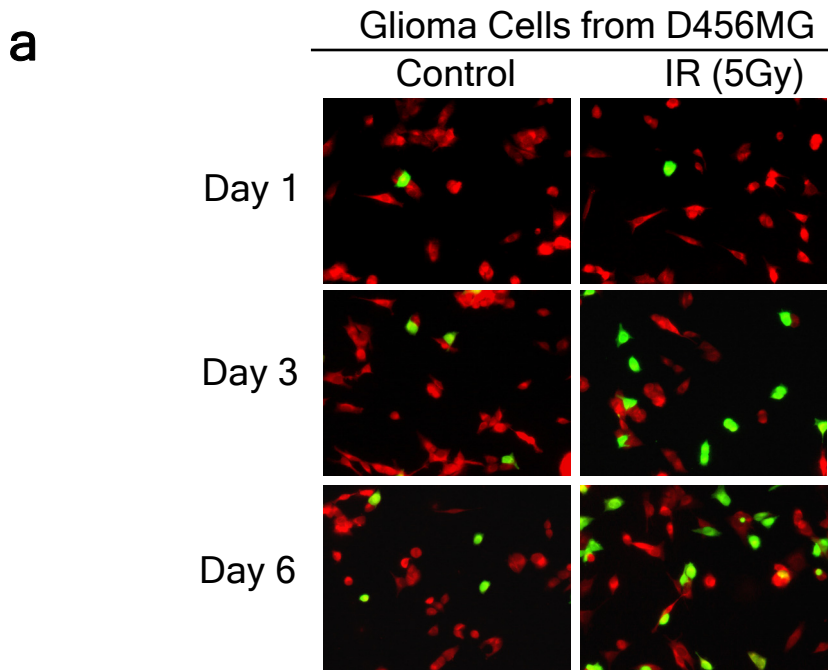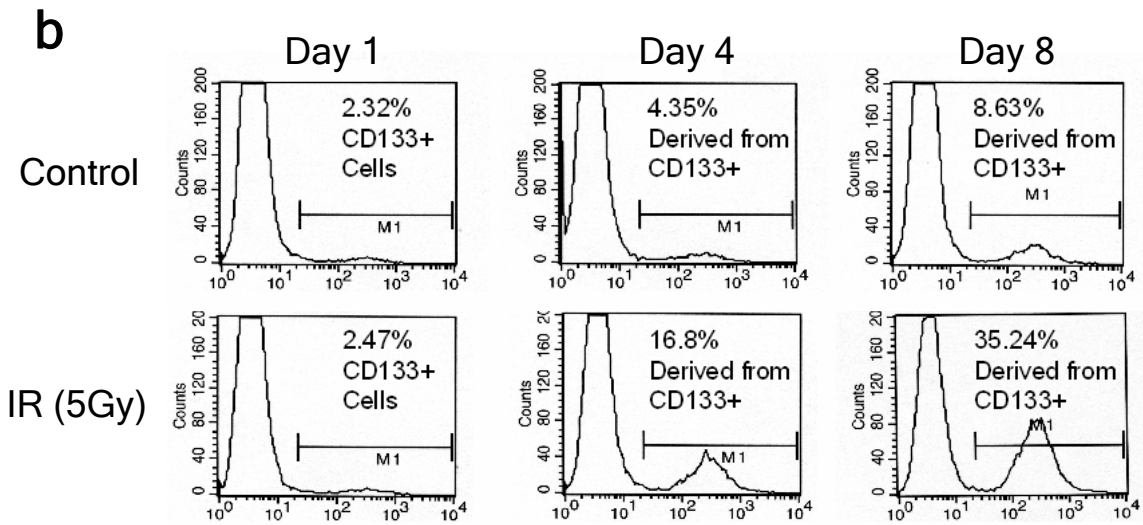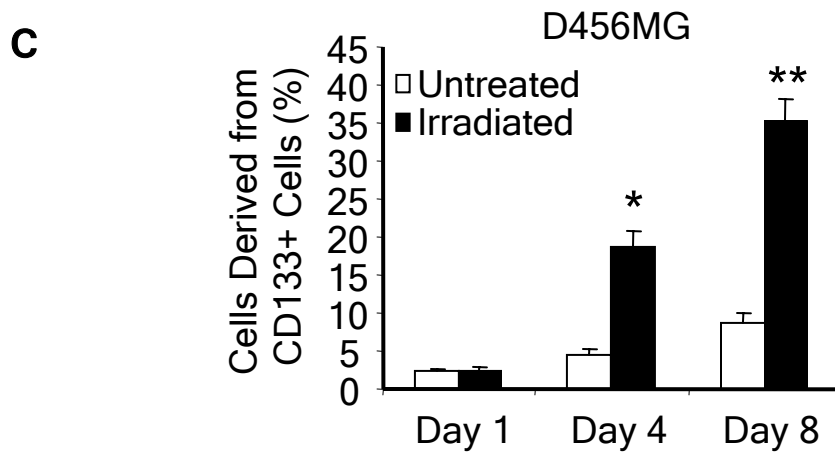

**a** 2 Gy Irradiated CD133+ cells derived from D456MG xenografts and primary glioma specimens are capable of tumour initiation in nude mouse brains

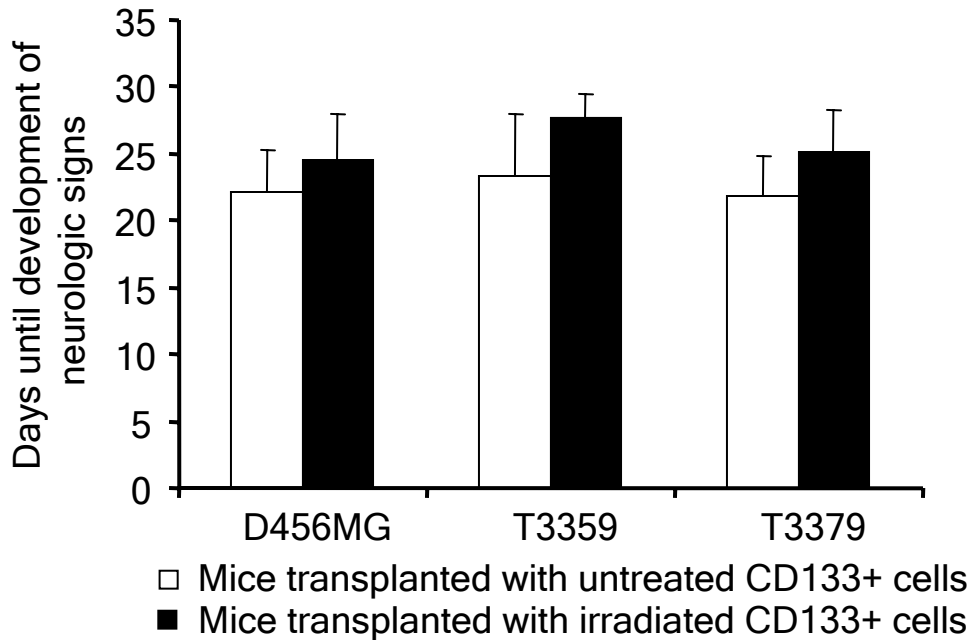

**b** Purified surviving CD133+ cells from 3 Gy irradiated D456MG and T3379 Xenografts are capable of tumour initiation in nude mouse brains

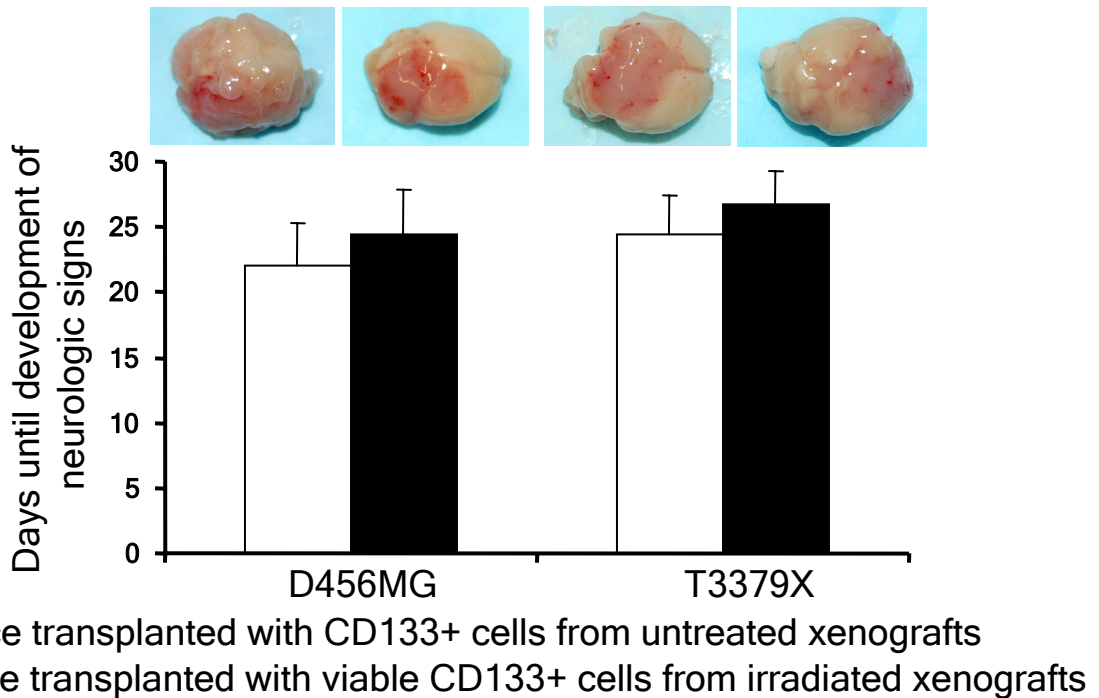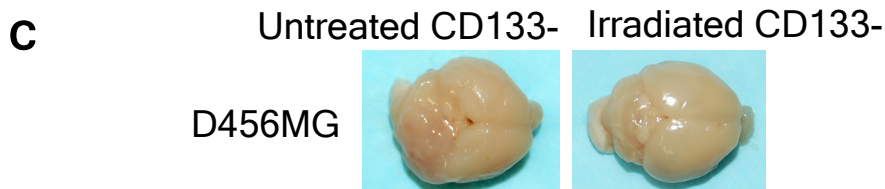



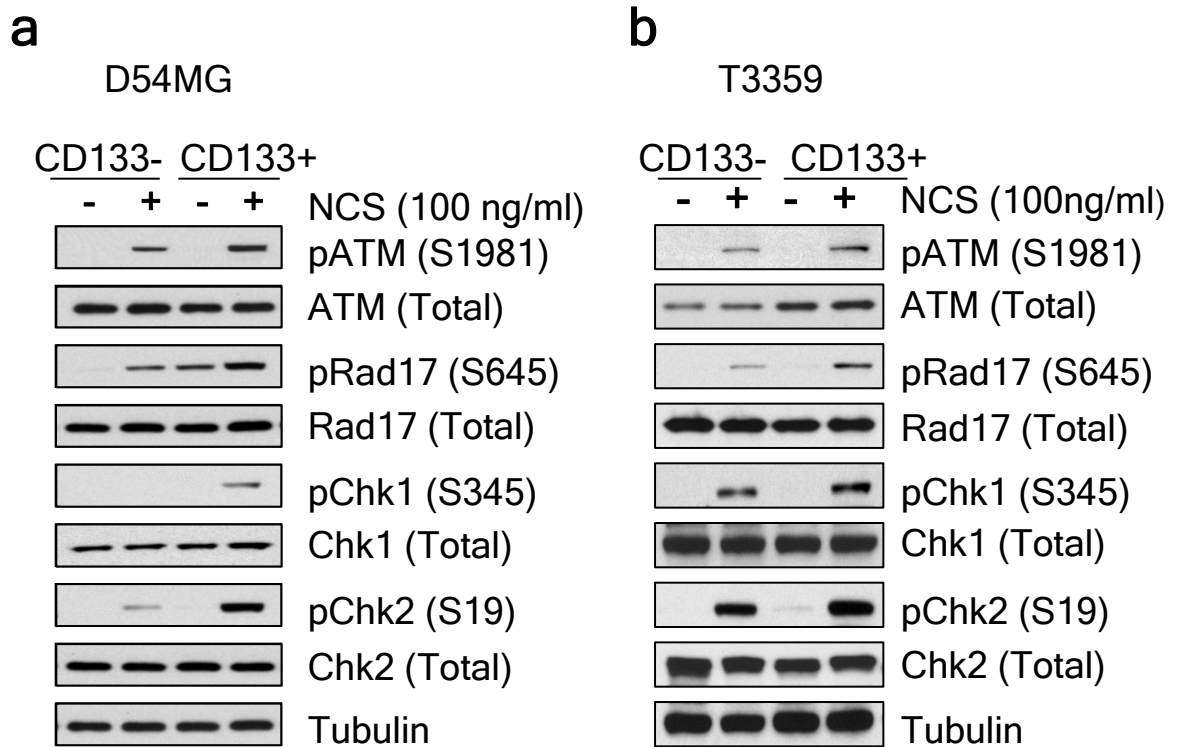

**c** ATM kinase activity induced by radiation in CD133+ cells is higher than in CD133- cells derived from human primary glioblastoma T3618

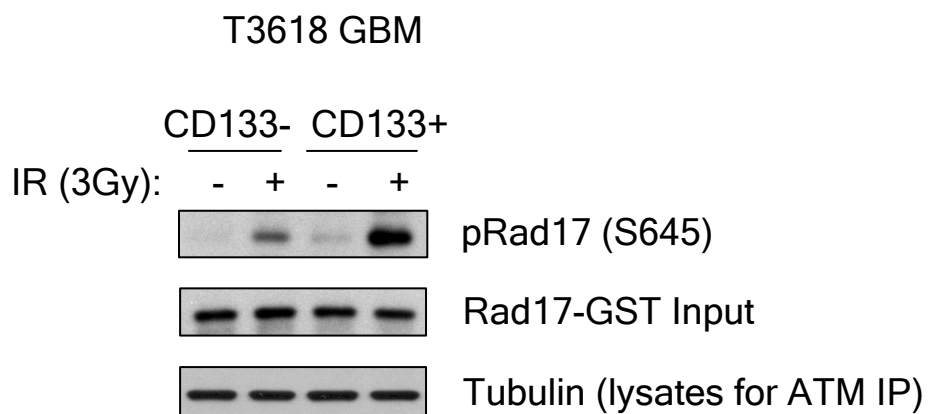

**a**

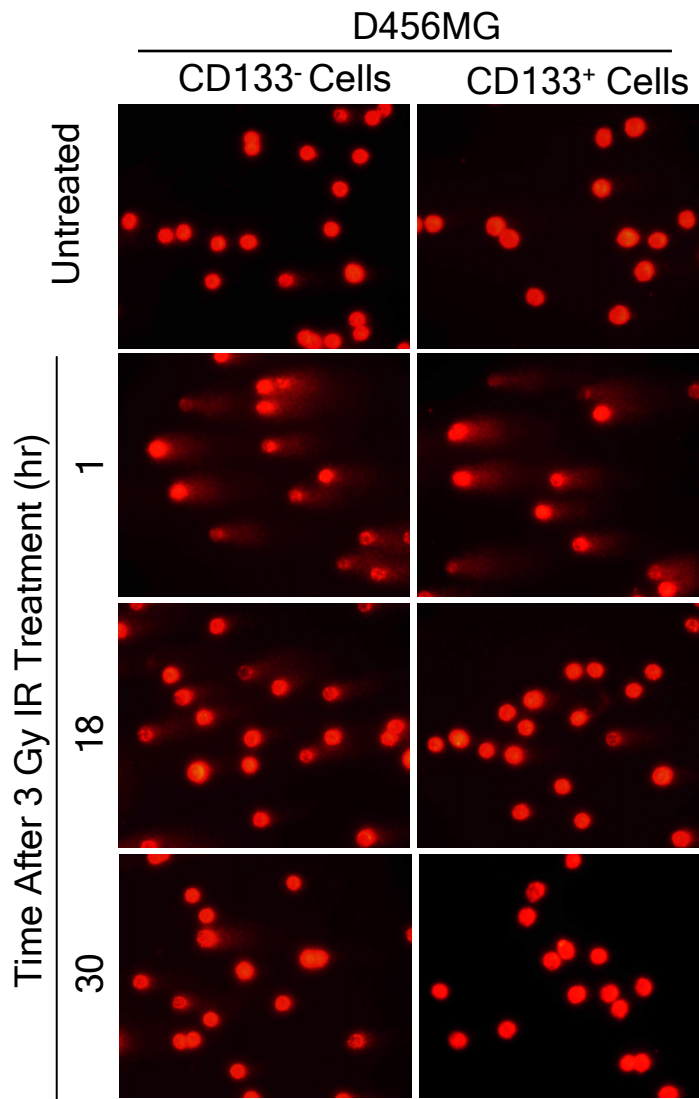

**b**

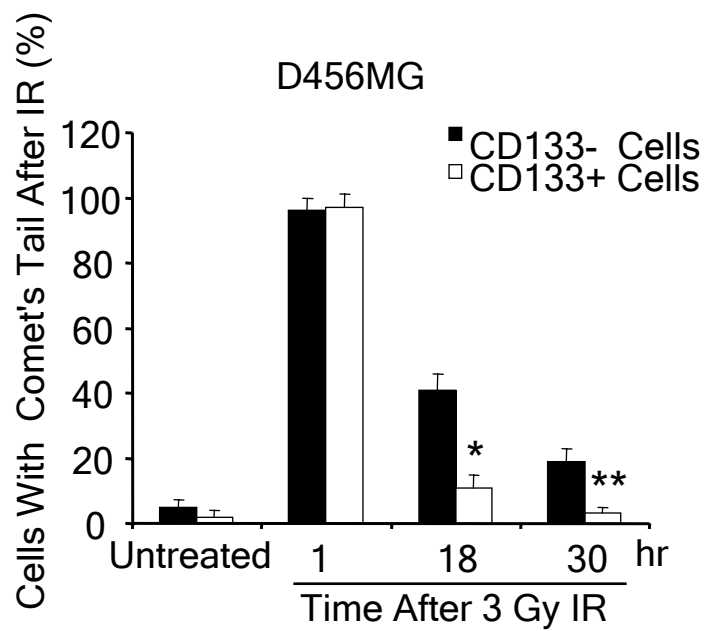

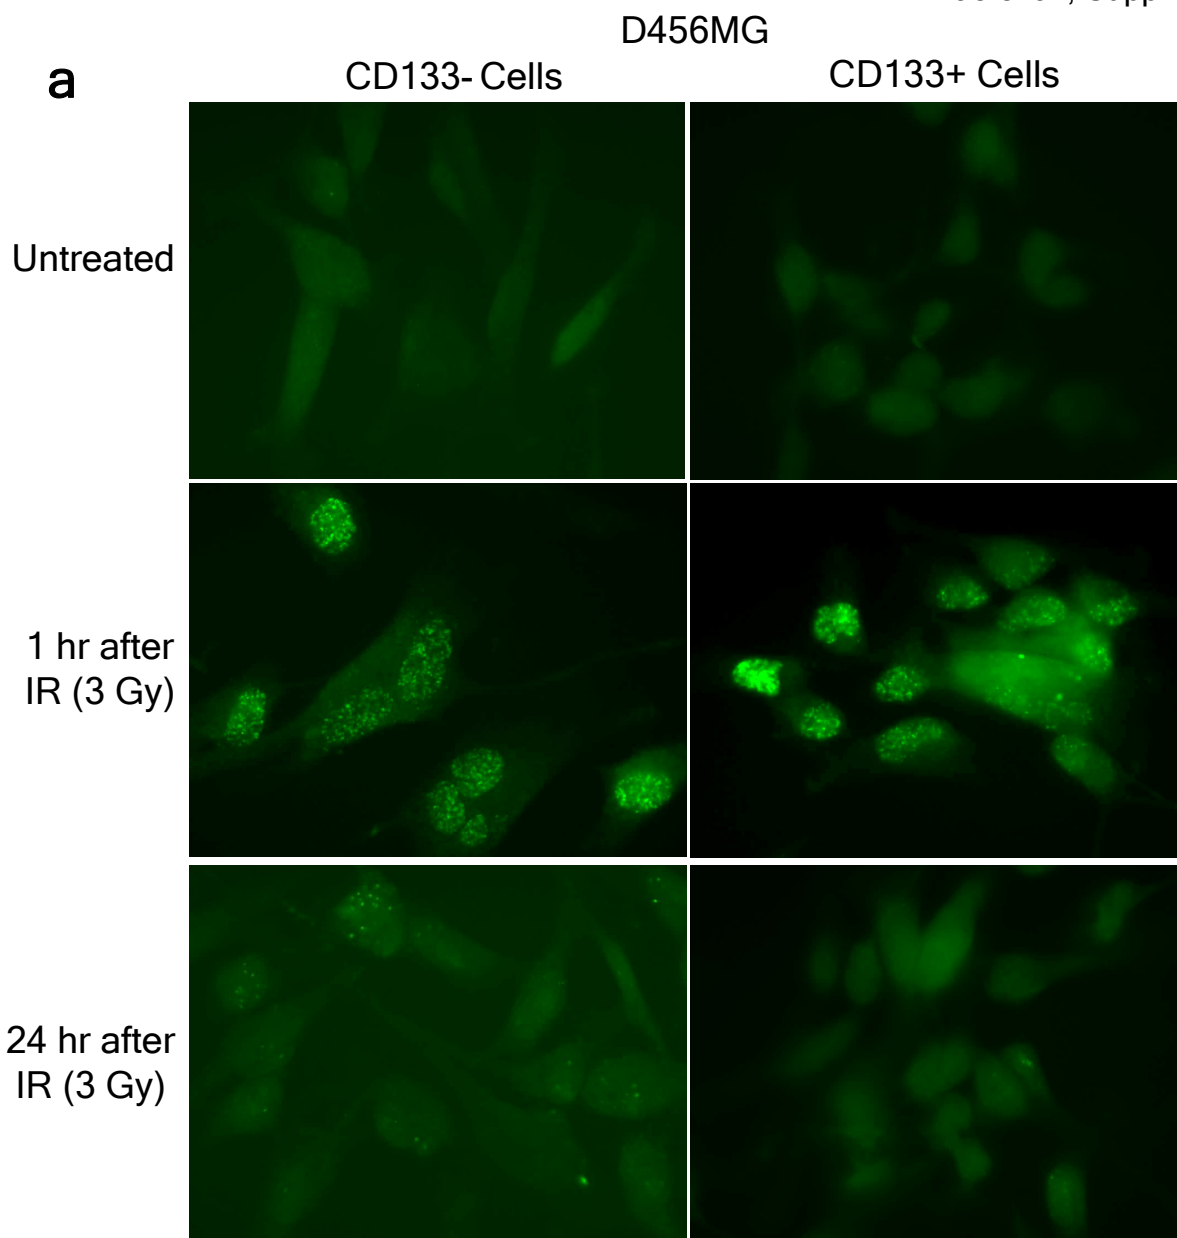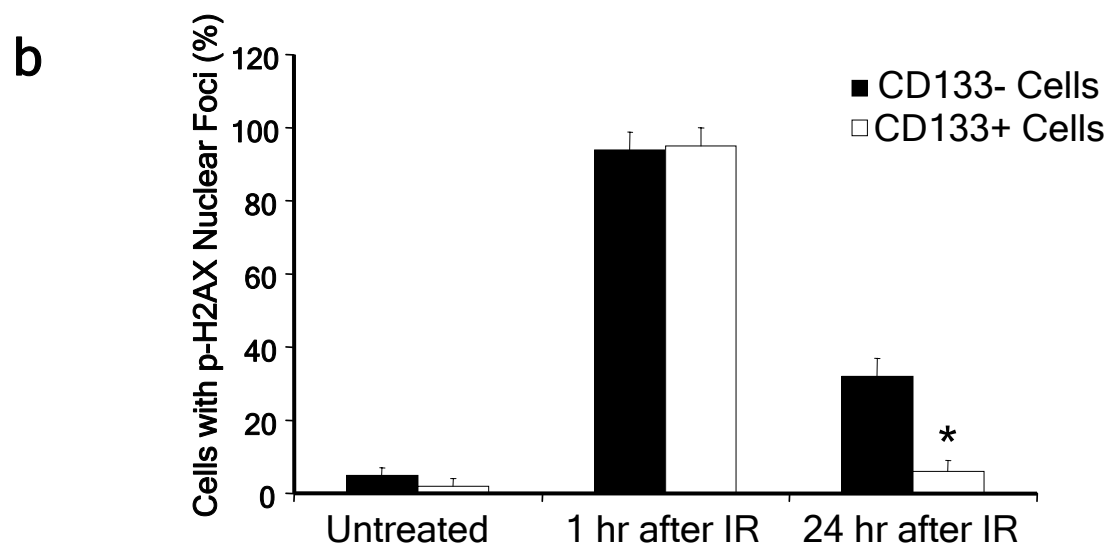

**a**

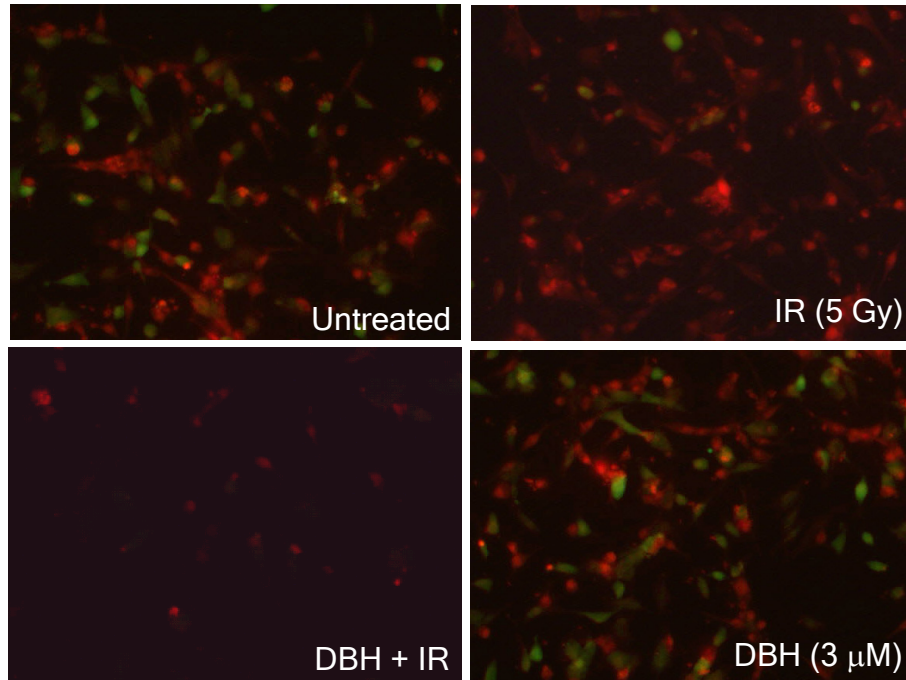

**b**

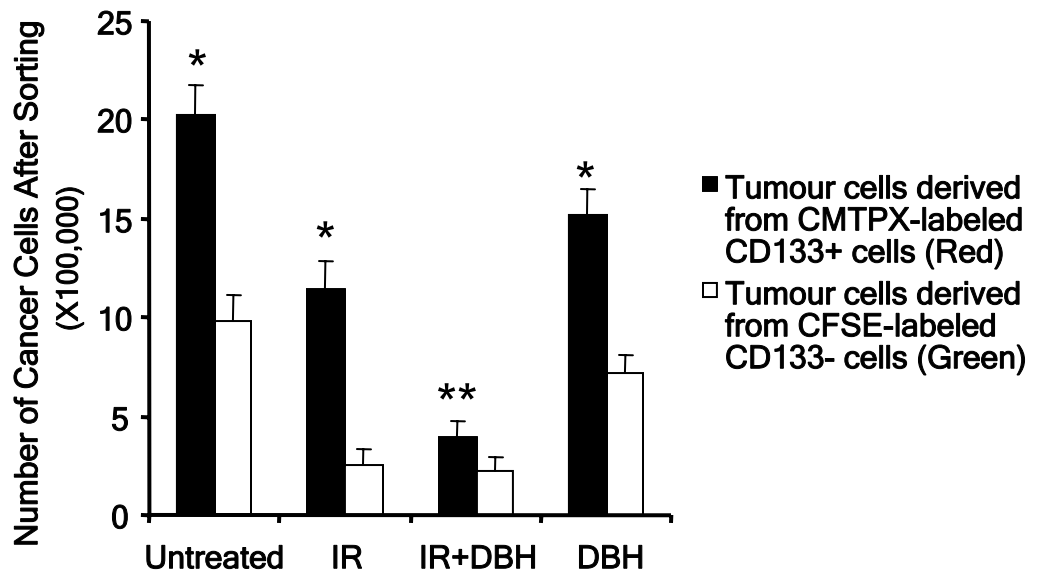

**c**

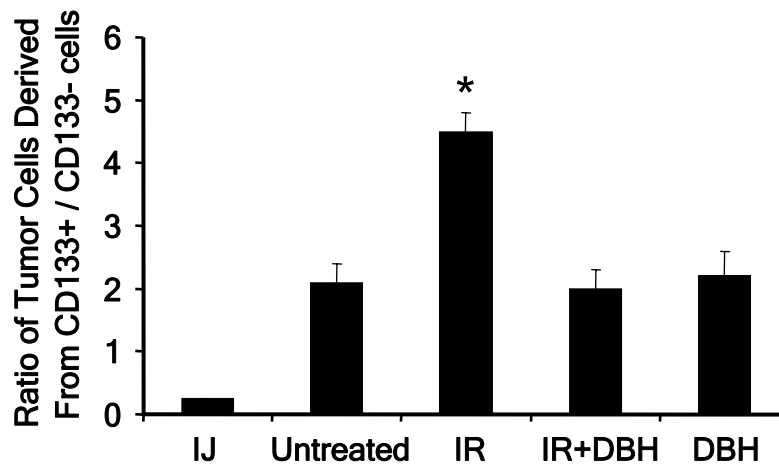

Supplement: 41586_2006_BFnature05236_MOESM1_ESM.pdf [file 41586_2006_BFnature05236_MOESM1_ESM.pdf]
